# Supplementary material for: Structural, Vibrational and UV/Vis Studies of Adamantane-Containing Triazole Thiones by Spectral, DFT and Multi-reference ab initio Methods
Source: publisher site journal article supplement (doi:10.1515/zpch-2018-1271), 2019-03-28
Supplement: Supplementary file 1 [file zpch-2018-1271_suppl.docx]

Supplementary Information for

**Structural, vibrational and UV/Vis studies of adamantane-containing triazole thiones
by spectral, DFT and multi-reference ab initio methods**

Maksim Shundalau, Yuliya L. Mindarava, Anna S. Matsukovich,
Sergey V. Gaponenko, Ali A. El-Emam, and Hamad M. Alkahtani

Table S1. Bond lengths of the compound **I**

| Bond | Bond length, Å | | Deviations | |
| --- | --- | --- | --- | --- |
| Experimental [18] | Calculated | Å | % |
| S1-C2 | 1.667 | 1.669 | -0.002 | -0.11 |
| N6-C2 | 1.385 | 1.400 | -0.015 | -1.08 |
| N6-C5 | 1.391 | 1.400 | -0.009 | -0.67 |
| N6-C7 | 1.443 | 1.438 | 0.005 | 0.36 |
| N4-C5 | 1.313 | 1.305 | 0.008 | 0.63 |
| N3-N4 | 1.388 | 1.369 | 0.019 | 1.35 |
| N3-C2 | 1.351 | 1.368 | -0.017 | -1.25 |
| N3-C23 | 1.487 | 1.457 | 0.030 | 2.04 |
| N24-C23 | 1.432 | 1.450 | -0.018 | -1.27 |
| N24-C25 | 1.465 | 1.465 | 0.000 | -0.02 |
| N24-C29 | 1.469 | 1.462 | 0.007 | 0.51 |
| N27-C28 | 1.466 | 1.460 | 0.006 | 0.44 |
| N27-C26 | 1.467 | 1.461 | 0.006 | 0.43 |
| N27-C30 | 1.463 | 1.467 | -0.004 | -0.26 |
| C25-C26 | 1.521 | 1.527 | -0.006 | -0.41 |
| C28-C29 | 1.519 | 1.528 | -0.009 | -0.61 |
| C5-C13 | 1.513 | 1.517 | -0.004 | -0.25 |
| C13-C14 | 1.542 | 1.554 | -0.012 | -0.76 |
| C13-C19 | 1.547 | 1.556 | -0.009 | -0.55 |
| C13-C18 | 1.552 | 1.557 | -0.005 | -0.33 |
| C19-C20 | 1.535 | 1.543 | -0.008 | -0.53 |
| C20-C21 | 1.530 | 1.543 | -0.013 | -0.82 |
| C20-C22 | 1.530 | 1.540 | -0.010 | -0.67 |
| C22-C17 | 1.533 | 1.541 | -0.008 | -0.52 |
| C17-C18 | 1.536 | 1.539 | -0.003 | -0.22 |
| C17-C16 | 1.541 | 1.541 | 0.000 | -0.02 |
| C21-C15 | 1.535 | 1.542 | -0.007 | -0.48 |
| C15-C16 | 1.528 | 1.540 | -0.012 | -0.81 |
| C15-C14 | 1.536 | 1.542 | -0.006 | -0.38 |
| C30-C31 | 1.513 | 1.526 | -0.013 | -0.83 |
| C31-C36 | 1.389 | 1.405 | -0.016 | -1.12 |
| C31-C32 | 1.401 | 1.405 | -0.004 | -0.26 |
| C32-C33 | 1.378 | 1.398 | -0.020 | -1.43 |
| C33-C34 | 1.389 | 1.398 | -0.009 | -0.68 |
| C34-C35 | 1.362 | 1.398 | -0.036 | -2.66 |
| C35-C36 | 1.393 | 1.398 | -0.005 | -0.38 |
| C7-C8 | 1.380 | 1.398 | -0.018 | -1.30 |
| C7-C12 | 1.388 | 1.398 | -0.010 | -0.72 |
| C8-C9 | 1.387 | 1.397 | -0.010 | -0.74 |
| C9-10 | 1.387 | 1.399 | -0.012 | -0.83 |
| C10-C11 | 1.384 | 1.398 | -0.014 | -1.03 |
| C11-C12 | 1.380 | 1.397 | -0.017 | -1.25 |
| C8-H37 [43] | 1.083 | 1.091 | -0.008 | -0.75 |
| C9-H38 [43] | 1.083 | 1.092 | -0.009 | -0.85 |
| C10-H39 [43] | 1.083 | 1.092 | -0.009 | -0.87 |
| C11-H40 [43] | 1.083 | 1.092 | -0.009 | -0.85 |
| C12-H41 [43] | 1.083 | 1.091 | -0.008 | -0.74 |
| C19-H50 [41] | 1.112 | 1.100 | 0.012 | 1.06 |
| C19-H51 [41] | 1.112 | 1.104 | 0.008 | 0.70 |
| C20-H52 [41] | 1.112 | 1.104 | 0.008 | 0.76 |
| C22-H55 [41] | 1.112 | 1.104 | 0.008 | 0.71 |
| C22-H56 [41] | 1.112 | 1.104 | 0.008 | 0.69 |
| C17-H47 [41] | 1.112 | 1.103 | 0.009 | 0.78 |
| C18-H48 [41] | 1.112 | 1.102 | 0.010 | 0.93 |
| C18-H49 [41] | 1.112 | 1.101 | 0.011 | 0.99 |
| C21-H53 [41] | 1.112 | 1.104 | 0.008 | 0.69 |
| C21-H54 [41] | 1.112 | 1.104 | 0.008 | 0.72 |
| C15-H44 [41] | 1.112 | 1.103 | 0.009 | 0.77 |
| C16-H45 [41] | 1.112 | 1.104 | 0.008 | 0.69 |
| C16-H46 [41] | 1.112 | 1.104 | 0.008 | 0.70 |
| C14-H42 [41] | 1.112 | 1.104 | 0.008 | 0.72 |
| C14-H43 [41] | 1.112 | 1.101 | 0.011 | 1.00 |
| C23-H57 [45] | 1.085 | 1.107 | -0.022 | -1.98 |
| C23-H58 [45] | 1.085 | 1.100 | -0.015 | -1.38 |
| C25-H59 [44] | 1.113 | 1.100 | 0.013 | 1.14 |
| C25-H60 [44] | 1.113 | 1.113 | 0.000 | 0.02 |
| C26-H61 [44] | 1.113 | 1.112 | 0.001 | 0.05 |
| C26-H62 [44] | 1.113 | 1.103 | 0.010 | 0.90 |
| C28-H63 [44] | 1.113 | 1.112 | 0.001 | 0.08 |
| C28-H64 [44] | 1.113 | 1.103 | 0.010 | 0.87 |
| C29-H65 [44] | 1.113 | 1.103 | 0.010 | 0.93 |
| C29-H66 [44] | 1.113 | 1.115 | -0.002 | -0.14 |
| C30-H67 [45] | 1.085 | 1.103 | -0.018 | -1.68 |
| C30-H68 [45] | 1.085 | 1.104 | -0.019 | -1.71 |
| C32-H69 [43] | 1.083 | 1.094 | -0.011 | -1.00 |
| C33-H70 [43] | 1.083 | 1.093 | -0.010 | -0.93 |
| C34-H71 [43] | 1.083 | 1.093 | -0.010 | -0.90 |
| C35-H72 [43] | 1.083 | 1.093 | -0.010 | -0.94 |
| C36-H73 [43] | 1.083 | 1.094 | -0.011 | -1.00 |

Table S2. Bond lengths of the compound **II**

| Bond | Bond length, Å | | Deviations | |
| --- | --- | --- | --- | --- |
| Experimental [19] | Calculated | Å | % |
| S1-C2 | 1.673 | 1.669 | 0.004 | 0.40 |
| N6-C2 | 1.381 | 1.400 | -0.019 | -1.89 |
| N6-C5 | 1.390 | 1.400 | -0.010 | -1.02 |
| N6-C7 | 1.439 | 1.438 | 0.001 | 0.11 |
| N4-C5 | 1.301 | 1.305 | -0.004 | -0.39 |
| N4-N3 | 1.387 | 1.369 | 0.018 | 1.77 |
| N3-C2 | 1.347 | 1.368 | -0.021 | -2.06 |
| N3-C23 | 1.478 | 1.458 | 0.020 | 2.04 |
| N24-C23 | 1.447 | 1.449 | -0.002 | -0.22 |
| N24-C25 | 1.462 | 1.463 | -0.001 | -0.14 |
| N24-C29 | 1.460 | 1.460 | 0.000 | 0.04 |
| N27-C30 | 1.418 | 1.412 | 0.006 | 0.60 |
| N27-C26 | 1.468 | 1.459 | 0.009 | 0.88 |
| N27-C28 | 1.468 | 1.467 | 0.001 | 0.11 |
| C25-C26 | 1.514 | 1.527 | -0.013 | -1.27 |
| C28-C29 | 1.525 | 1.528 | -0.003 | -0.28 |
| C5-C13 | 1.546 | 1.517 | 0.029 | 2.87 |
| C13-C14 | 1.512 | 1.555 | -0.043 | -4.33 |
| C13-C18 | 1.511 | 1.554 | -0.043 | -4.31 |
| C13-C19 | 1.518 | 1.557 | -0.039 | -3.88 |
| C19-C20 | 1.503 | 1.543 | -0.040 | -3.98 |
| C20-C21 | 1.502 | 1.542 | -0.040 | -4.01 |
| C20-C22 | 1.504 | 1.541 | -0.037 | -3.66 |
| C21-C15 | 1.502 | 1.542 | -0.040 | -3.98 |
| C15-C16 | 1.503 | 1.540 | -0.037 | -3.71 |
| C15-C14 | 1.503 | 1.543 | -0.040 | -4.02 |
| C22-C17 | 1.504 | 1.541 | -0.037 | -3.68 |
| C16-C17 | 1.502 | 1.541 | -0.039 | -3.87 |
| C17-C18 | 1.505 | 1.540 | -0.035 | -3.47 |
| C7-C8 | 1.382 | 1.398 | -0.016 | -1.57 |
| C7-C12 | 1.378 | 1.398 | -0.020 | -2.03 |
| C8-C9 | 1.403 | 1.398 | 0.005 | 0.52 |
| C9-C10 | 1.363 | 1.398 | -0.035 | -3.50 |
| C10-C11 | 1.375 | 1.399 | -0.024 | -2.38 |
| C11-C12 | 1.396 | 1.397 | -0.001 | -0.06 |
| C30-C35 | 1.400 | 1.410 | -0.010 | -1.00 |
| C30-C31 | 1.403 | 1.413 | -0.010 | -1.03 |
| C35-C34 | 1.378 | 1.399 | -0.021 | -2.11 |
| C34-C33 | 1.401 | 1.395 | 0.006 | 0.59 |
| C33-C32 | 1.372 | 1.400 | -0.028 | -2.84 |
| C32-C31 | 1.396 | 1.393 | 0.003 | 0.32 |
| C8-H36 [43] | 1.083 | 1.091 | -0.008 | -0.81 |
| C9-H37 [43] | 1.083 | 1.092 | -0.009 | -0.92 |
| C10-H38 [43] | 1.083 | 1.092 | -0.009 | -0.95 |
| C11-H39 [43] | 1.083 | 1.092 | -0.009 | -0.92 |
| C12-H40 [43] | 1.083 | 1.091 | -0.008 | -0.80 |
| C19-H49 [41] | 1.112 | 1.101 | 0.011 | 1.09 |
| C19-H50 [41] | 1.112 | 1.104 | 0.008 | 0.81 |
| C20-H51 [41] | 1.112 | 1.103 | 0.009 | 0.85 |
| C21-H52 [41] | 1.112 | 1.104 | 0.008 | 0.76 |
| C21-H53 [41] | 1.112 | 1.104 | 0.008 | 0.78 |
| C15-H43 [41] | 1.112 | 1.103 | 0.009 | 0.86 |
| C14-H41 [41] | 1.112 | 1.104 | 0.008 | 0.80 |
| C14-H42 [41] | 1.112 | 1.100 | 0.012 | 1.19 |
| C16-H44 [41] | 1.112 | 1.104 | 0.008 | 0.78 |
| C16-H45 [41] | 1.112 | 1.104 | 0.008 | 0.76 |
| C17-H46 [41] | 1.112 | 1.103 | 0.009 | 0.87 |
| C18-H47 [41] | 1.112 | 1.101 | 0.011 | 1.11 |
| C18-H48 [41] | 1.112 | 1.102 | 0.010 | 1.03 |
| C22-H54 [41] | 1.112 | 1.104 | 0.008 | 0.71 |
| C22-H55 [41] | 1.112 | 1.104 | 0.008 | 0.69 |
| C23-H56 [45] | 1.085 | 1.106 | -0.021 | -2.08 |
| C23-H57 [45] | 1.085 | 1.100 | -0.015 | -1.47 |
| C25-H58 [44] | 1.113 | 1.100 | 0.013 | 1.29 |
| C25-H59 [44] | 1.113 | 1.113 | 0.000 | 0.02 |
| C26-H60 [44] | 1.113 | 1.112 | 0.001 | 0.08 |
| C26-H61 [44] | 1.113 | 1.100 | 0.013 | 1.34 |
| C28-H62 [44] | 1.113 | 1.111 | 0.002 | 0.17 |
| C28-H63 [44] | 1.113 | 1.097 | 0.016 | 1.60 |
| C29-H64 [44] | 1.113 | 1.102 | 0.011 | 1.06 |
| C29-H65 [44] | 1.113 | 1.114 | -0.001 | -0.15 |
| C35-H70 [43] | 1.083 | 1.090 | -0.007 | -0.69 |
| C34-H69 [43] | 1.083 | 1.093 | -0.010 | -1.03 |
| C33-H68 [43] | 1.083 | 1.092 | -0.009 | -0.90 |
| C32-H67 [43] | 1.083 | 1.093 | -0.010 | -1.02 |
| C31-H66 [43] | 1.083 | 1.092 | -0.009 | -0.85 |

Table S3. Planar angles of the compound **I**

| Angle | Angle value, deg. | | Deviations | |
| --- | --- | --- | --- | --- |
| Experimental [18] | Calculated | Deg. | % |
| C5-N6-C7 | 128.90 | 130.30 | -1.40 | -1.07 |
| C5-N4-N3 | 104.90 | 106.02 | -1.12 | -1.06 |
| C2-N3-N4 | 113.09 | 113.20 | -0.11 | -0.18 |
| C2-N3-C23 | 126.60 | 127.29 | -0.69 | -0.54 |
| N4-N3-C23 | 119.69 | 119.51 | 0.18 | 0.08 |
| C23-N24-C25 | 115.21 | 112.54 | 2.67 | 2.36 |
| C23-N24-C29 | 114.27 | 113.26 | 1.01 | 0.83 |
| C25-N24-C29 | 110.60 | 110.62 | -0.02 | -0.02 |
| C28-N27-C26 | 109.40 | 111.09 | -1.69 | -1.52 |
| C28-N27-C30 | 111.60 | 115.01 | -3.41 | -2.96 |
| C26-N27-C30 | 111.13 | 114.80 | -3.67 | -3.22 |
| N3-C2-N6 | 103.30 | 102.62 | 0.68 | 0.66 |
| N3-C2-S1 | 129.07 | 129.56 | -0.49 | -0.43 |
| N6-C2-S1 | 127.64 | 127.82 | -0.18 | -0.17 |
| N4-C5-N6 | 109.90 | 109.92 | -0.02 | -0.02 |
| N4-C5-C13 | 122.10 | 121.84 | 0.26 | 0.21 |
| N6-C5-C13 | 127.80 | 128.17 | -0.37 | -0.29 |
| C8-C7-C12 | 121.40 | 120.48 | 0.92 | 0.76 |
| C4-C7-N6 | 119.60 | 119.74 | -0.14 | -0.12 |
| C12-C7-N6 | 119.00 | 119.77 | -0.77 | -0.64 |
| C7-C8-C9 | 119.00 | 119.64 | -0.64 | -0.53 |
| C8-C9-C10 | 119.90 | 120.13 | -0.23 | -0.19 |
| C11-C10-C9 | 120.50 | 119.96 | 0.54 | 0.45 |
| C12-C11-C10 | 120.00 | 120.13 | -0.13 | -0.11 |
| C11-C12-C7 | 119.10 | 119.64 | -0.54 | -0.45 |
| C5-C13-C14 | 108.70 | 110.82 | -2.12 | -1.91 |
| C5-C13-C19 | 113.90 | 112.44 | 1.46 | 1.30 |
| C14-C13-C19 | 109.40 | 108.69 | 0.71 | 0.65 |
| C5-C13-C18 | 109.00 | 108.48 | 0.52 | 0.48 |
| C14-C13-C18 | 107.80 | 108.15 | -0.35 | -0.32 |
| C19-C13-C18 | 107.90 | 108.14 | -0.24 | -0.22 |
| C20-C19-C13 | 110.30 | 110.23 | 0.07 | 0.06 |
| C21-C20-C19 | 109.10 | 109.47 | -0.37 | -0.34 |
| C21-C20-C22 | 110.10 | 109.48 | 0.62 | 0.57 |
| C16-C15-C14 | 109.50 | 109.75 | -0.25 | -0.23 |
| C16-C15-C21 | 110.00 | 109.49 | 0.51 | 0.47 |
| C14-C15-C21 | 108.90 | 109.39 | -0.49 | -0.45 |
| C15-C16-C17 | 109.40 | 109.24 | 0.16 | 0.15 |
| C15-C14-C13 | 110.60 | 110.36 | 0.24 | 0.22 |
| N24-C23-N3 | 116.70 | 111.88 | 4.82 | 4.31 |
| N24-C25-C26 | 108.80 | 109.94 | -1.14 | -1.04 |
| N27-C26-C25 | 109.70 | 110.06 | -0.36 | -0.33 |
| N27-C28-C29 | 109.60 | 109.76 | -0.16 | -0.15 |
| N24-C29-C28 | 109.52 | 109.94 | -0.42 | -0.40 |
| C19-C20-C22 | 109.60 | 109.87 | -0.27 | -0.25 |
| C22-C17-C18 | 109.90 | 109.64 | 0.26 | 0.24 |
| C22-C17-C16 | 109.10 | 109.55 | -0.45 | -0.41 |
| C18-C17-C16 | 109.40 | 109.63 | -0.23 | -0.21 |
| N27-C30-C31 | 113.10 | 117.27 | -4.17 | -3.56 |
| C36-C31-C32 | 117.80 | 118.09 | -0.29 | -0.25 |
| C36-C31-C30 | 121.90 | 120.81 | 1.09 | 0.90 |
| C32-C31-C30 | 120.10 | 121.09 | -0.99 | -0.82 |
| C33-C32-C31 | 120.60 | 121.13 | -0.53 | -0.44 |
| C32-C33-C34 | 120.80 | 120.13 | 0.67 | 0.56 |
| C35-C34-C33 | 119.20 | 119.51 | -0.31 | -0.26 |
| C34-C35-C36 | 120.60 | 120.08 | 0.52 | 0.43 |
| C31-C36-C35 | 121.00 | 121.13 | -0.13 | -0.11 |

Table S4. Planar angles of the compound **II**

| Angle | Angle value, deg. | | Deviations | |
| --- | --- | --- | --- | --- |
| Experimental [19] | Calculated | Deg. | % |
| C7-C12-C11 | 119.0 | 119.65 | -0.65 | -0.54 |
| C8-C7-C12 | 121.3 | 120.46 | 0.84 | 0.70 |
| C12-C7-N6 | 119.5 | 119.58 | -0.08 | -0.07 |
| C7-C8-C9 | 119.0 | 119.63 | -0.63 | -0.53 |
| C2-N6-C7 | 121.7 | 121.61 | 0.09 | 0.07 |
| C5-N6-C7 | 130.0 | 130.19 | -0.19 | -0.15 |
| C10-C9-C8 | 120.2 | 120.13 | 0.07 | 0.06 |
| C8-C7-N6 | 119.2 | 119.88 | -0.68 | -0.57 |
| C9-C10-C11 | 120.4 | 120.10 | 0.30 | 0.25 |
| C10-C11-C12 | 120.7 | 120.40 | 0.30 | 0.25 |
| N3-C2-N6 | 104.0 | 102.63 | 1.37 | 1.33 |
| N6-C2-S1 | 127.3 | 127.93 | -0.63 | -0.49 |
| N4-C5-N6 | 110.2 | 109.95 | 0.25 | 0.23 |
| N6-C5-C13 | 127.1 | 128.23 | -1.13 | -0.88 |
| C5-N4-N3 | 105.4 | 106.20 | -0.80 | -0.75 |
| N3-C2-S1 | 128.7 | 129.44 | -0.74 | -0.57 |
| N3-C23-N24 | 116.3 | 111.90 | 4.40 | 3.93 |
| C2-N3-N4 | 112.3 | 113.21 | -0.91 | -0.80 |
| N4-C5-C13 | 122.7 | 121.82 | 0.88 | 0.72 |
| N4-N3-C23 | 117.6 | 119.44 | -1.84 | -1.54 |
| C2-N6-C5 | 108.1 | 108.19 | -0.09 | -0.08 |
| C2-N3-C23 | 129.8 | 127.35 | 2.45 | 1.92 |
| C5-C13-C14 | 112.3 | 111.16 | 1.14 | 1.03 |
| C5-C13-C18 | 112.6 | 109.57 | 3.03 | 2.77 |
| C19-C13-C5 | 112.3 | 111.16 | 1.14 | 1.03 |
| C21-C15-C14 | 109.1 | 109.80 | -0.70 | -0.64 |
| C16-C15-C14 | 109.5 | 109.48 | 0.02 | 0.02 |
| C14-C13-C18 | 105.9 | 108.70 | -2.80 | -2.58 |
| C14-C13-C19 | 112.7 | 111.16 | 1.54 | 1.39 |
| C18-C13-C19 | 108.7 | 108.14 | 0.56 | 0.52 |
| C16-C17-C18 | 109.6 | 109.57 | 0.03 | 0.03 |
| C22-C17-C18 | 109.5 | 109.80 | -0.30 | -0.27 |
| C21-C15-C16 | 109.9 | 109.51 | 0.39 | 0.36 |
| C21-C20-C19 | 109.6 | 109.48 | 0.12 | 0.11 |
| C21-C20-C22 | 109.4 | 109.71 | -0.31 | -0.28 |
| C16-C17-C22 | 109.1 | 109.51 | -0.41 | -0.37 |
| C19-C20-C22 | 109.9 | 109.57 | 0.33 | 0.30 |
| C13-C14-C15 | 110.5 | 110.22 | 0.28 | 0.25 |
| C15-C21-C20 | 109.4 | 109.53 | -0.13 | -0.12 |
| C13-C18-C17 | 109.1 | 110.72 | -1.62 | -1.46 |
| C20-C19-C13 | 109.6 | 110.29 | -0.69 | -0.63 |
| C20-C22-C17 | 110.0 | 109.22 | 0.78 | 0.71 |
| C23-N24-C25 | 113.0 | 113.58 | -0.58 | -0.51 |
| C23-N24-C29 | 114.5 | 113.57 | 0.93 | 0.82 |
| N24-C29-C28 | 110.2 | 109.76 | 0.44 | 0.40 |
| N24-C25-C26 | 109.8 | 110.39 | -0.59 | -0.53 |
| C25-N24-C29 | 110.8 | 110.43 | 0.37 | 0.34 |
| N27-C28-C29 | 110.6 | 110.74 | -0.14 | -0.13 |
| C25-C26-N27 | 109.1 | 110.32 | -1.22 | -1.11 |
| C26-N27-C28 | 110.9 | 111.52 | -0.62 | -0.56 |
| C30-N27-C26 | 115.1 | 117.53 | -2.43 | -2.07 |
| C30-N27-C28 | 115.6 | 118.40 | -2.80 | -2.36 |
| N27-C30-C35 | 122.9 | 120.97 | 1.93 | 1.60 |
| N27-C30-C31 | 118.9 | 119.92 | -1.02 | -0.85 |
| C35-C34-C33 | 120.6 | 120.81 | -0.21 | -0.17 |
| C32-C33-C34 | 119.0 | 118.66 | 0.34 | 0.29 |
| C32-C31-C30 | 120.2 | 120.85 | -0.65 | -0.54 |
| C35-C30-C31 | 118.2 | 117.61 | 0.59 | 0.50 |
| C30-C31-C32 | 120.9 | 121.10 | -0.20 | -0.17 |

Table S5. Frequencies and intensities in experimental and calculated IR and Raman spectra of the compound **I**

| Observed | | | | Calculated | | | Assignment |
| --- | --- | --- | --- | --- | --- | --- | --- |
| IR | | Raman | | ν | IR | Raman |  |
| 3103 | vw |  |  |  |  |  | 1608+1498 |
| 3082 | w |  |  | 3209 | 0.01 | 0.90 | νCH(Ph) |
|  |  |  |  | 3206 | 0.05 | 0.01 | νCH(Ph) |
| 3059 | w | 3059 | vs | 3196 | 0.18 | 0.40 | νCH(Ph) |
|  |  | 3054 | sh | 3194 | 0.14 | 1.00 | νCH(Ph) |
|  |  | 3050 | sh | 3186 | 0.05 | 0.43 | νCH(Ph) |
| 3039 | w |  |  | 3182 | 0.27 | 0.15 | νCH(Ph) |
| 3028 | sh | 3031 | w | 3175 | 0.00 | 0.16 | νCH(Ph) |
| 3024 | w |  |  | 3173 | 0.06 | 0.36 | νCH(Ph) |
|  |  |  |  | 3161 | 0.02 | 0.27 | νCH(Ph) |
| 3001 | w |  |  | 3158 | 0.06 | 0.03 | νCH(Ph) |
|  |  | 2981 | w |  |  |  | 2×1497 |
|  |  |  |  | 3093 | 0.14 | 0.22 | νCH2(M) |
| 2959 | sh | 2956 | w | 3091 | 0.25 | 0.43 | νCH(A) |
| 2949 | sh |  |  | 3090 | 0.11 | 0.38 | νCH(P) |
|  |  |  |  | 3089 | 0.22 | 0.19 | νCH2(A) |
| 2941 | vs | 2942 | vs | 3085 | 0.08 | 0.14 | νCH2(A) |
|  |  |  |  | 3064 | 0.22 | 0.25 | νCH2(M) |
|  |  |  |  | 3058 | 0.81 | 0.70 | νCH2(A) |
|  |  |  |  | 3057 | 0.18 | 0.43 | νCH(P) |
|  |  |  |  | 3053 | 0.43 | 0.07 | νCH(P) |
| 2927 | vs | 2926 | vs | 3053 | 0.19 | 0.36 | νCH2(M) |
|  |  |  |  | 3052 | 0.16 | 0.10 | νCH2(A) |
| 2919 | vs | 2917 | s | 3050 | 0.12 | 0.91 | νCH2(M) |
|  |  |  |  | 3050 | 0.24 | 0.28 | νCH(P) |
|  |  |  |  | 3040 | 0.43 | 0.82 | νCH(A)+νCH2(A) |
| 2902 | vs | 2901 | m | 3035 | 0.98 | 0.15 | νCH2(A) |
| 2899 | vs | 2900 | m | 3032 | 0.54 | 0.26 | νCH2(A) |
|  |  |  |  | 3024 | 0.20 | 0.14 | νCH(A)+νCH2(A) |
|  |  |  |  | 3022 | 0.05 | 0.20 | νCH2(A) |
| 2879 | vs | 2881 | m | 3016 | 0.36 | 0.39 | νCH2(A) |
|  |  |  |  | 3013 | 0.10 | 0.16 | νCH2(M) |
| 2852 | s | 2852 | m | 3011 | 0.09 | 0.18 | νCH2(A) |
| 2848 | s | 2848 | m | 3010 | 0.10 | 0.23 | νCH2(A) |
|  |  |  |  | 3001 | 0.20 | 0.29 | νCH2(M) |
| 2825 | s |  |  | 2940 | 1.00 | 0.02 | νCH(P)+νCH2(P) |
|  |  |  |  | 2936 | 0.03 | 0.17 | νCH(P)+νCH2(P) |
|  |  |  |  | 2928 | 0.12 | 0.32 | νCH(P)+νCH2(P) |
| 2814 | s | 2814 | w | 2908 | 0.55 | 0.34 | νCH(P)+νCH2(P) |
| 2802 | sh |  |  |  |  |  | 1608+1196 |
| 2795 | sh |  |  |  |  |  | 1498+1298 |
| 2790 | sh |  |  |  |  |  | 1597+1196 |
| 2771 | m |  |  |  |  |  | 1498+1273 |
| 2758 | m |  |  |  |  |  | 1471+1288 |
| 2684 | w |  |  |  |  |  | 2×1354 |
| 1608 | w | 1608 | w | 1654 | 0.01 | 0.09 | νCC(Ph)+δ(i.p.)CCC(Ph) |
| 1597 | m | 1596 | m | 1652 | 0.06 | 0.10 | νCC(Ph) |
|  |  | 1584 | w | 1640 | 0.02 | 0.02 | νCC(Ph)+δ(i.p.)CCC(Ph) |
|  |  |  |  | 1632 | 0.01 | 0.02 | νCC(Ph)+δ(i.p.)CCC(Ph) |
| 1527 | m | 1527 | m | 1598 | 0.37 | 0.29 | νCN(T)+νCC(A) |
| 1498 | s | 1497 | wv | 1530 | 0.36 | 0.01 | νCC(Ph) |
| 1494 | sh | 1494 | wv | 1522 | 0.05 | 0.00 | νCC(Ph)+δ(i.p.)CCC(Ph) |
| 1481 | w |  |  | 1494 | 0.01 | 0.00 | σCH2(A) |
| 1471 | w |  |  | 1484 | 0.04 | 0.05 | σCH2(M) |
| 1452 | vs |  |  | 1480 | 0.05 | 0.00 | νCC(Ph)+δ(i.p.)CH(Ph) |
|  |  |  |  | 1479 | 0.06 | 0.00 | νCC(Ph)+δ(i.p.)CH(Ph) |
| 1446 | sh | 1446 | m | 1479 | 0.14 | 0.02 | σCH2(P) |
| 1441 | vs | 1441 | sh | 1475 | 0.05 | 0.01 | σCH2(A) |
|  |  |  |  | 1471 | 0.06 | 0.01 | σCH2(A) |
| 1421 | s | 1421 | w | 1467 | 0.07 | 0.01 | σCH2(P) |
| 1408 | sh |  |  | 1463 | 0.03 | 0.00 | ωCH2(P) |
| 1394 | m |  |  | 1460 | 0.45 | 0.08 | ωCH2(P) |
|  |  |  |  | 1459 | 0.01 | 0.06 | σCH2(A) |
|  |  |  |  | 1454 | 0.25 | 0.02 | σCH2(A)+σCH2(P) |
|  |  |  |  | 1453 | 0.12 | 0.07 | σCH2(A)+σCH2(P) |
|  |  |  |  | 1447 | 0.74 | 0.05 | σCH2(P)+γCH2(M) |
|  |  |  |  | 1436 | 0.07 | 0.05 | σCH2(M) |
|  |  |  |  | 1424 | 0.09 | 0.02 | σCH2(P)+σCH2(M) |
|  |  |  |  | 1408 | 0.32 | 0.01 | σCH2(P)+σCH2(M) |
| 1381 | s | 1380 | w | 1405 | 0.28 | 0.09 | νCN(T)+νC(T)C(A)+νN(T)C(Ph) |
|  |  |  |  | 1401 | 0.22 | 0.04 | ωCH2(P)+νCN(T) |
|  |  |  |  | 1395 | 0.00 | 0.00 | νCC(A) |
|  |  |  |  | 1392 | 0.01 | 0.00 | νCC(A) |
| 1369 | s | 1367 | w | 1389 | 0.05 | 0.03 | ωCH(A) |
| 1354 | s | 1350 | vw | 1386 | 0.17 | 0.00 | νCN(P)+ωCH2(P) |
|  |  |  |  | 1382 | 0.00 | 0.00 | νCC(A)+ωCH2(A) |
|  |  |  |  | 1376 | 0.00 | 0.00 | νCC(A)+ωCH2(A) |
|  |  |  |  | 1365 | 0.02 | 0.00 | νCC(Ph)+δ(i.p.)CH(Ph) |
|  |  |  |  | 1356 | 0.17 | 0.01 | νCC(Ph)+δ(i.p.)CH(Ph) |
| 1335 | s |  |  | 1356 | 0.49 | 0.02 | νCN(T)+νNN(T) |
|  |  |  |  | 1353 | 0.16 | 0.02 | νCC(Ph)+ωCH2(M) |
|  |  |  |  | 1350 | 0.08 | 0.01 | νCC(P)+ωCH2(P) |
|  |  |  |  | 1350 | 0.08 | 0.01 | νCC(Ph)+ωCH2(M) |
|  |  |  |  | 1346 | 0.01 | 0.00 | ωCH(A)+ωCH2(A) |
| 1325 | vs | 1325 | m | 1343 | 0.05 | 0.00 | ωCH(A)+ωCH2(A) |
|  |  |  |  | 1341 | 0.37 | 0.01 | ωCH(A)+ωCH2(A) |
| 1317 | sh | 1317 | sh | 1340 | 0.54 | 0.01 | νCC(A)+νC(M)N(T) |
|  |  |  |  | 1334 | 0.28 | 0.07 | νCN(P)+γCH2(P) |
| 1298 | vs | 1294 | w | 1326 | 0.94 | 0.04 | νCN(P)+γCH2(P) |
|  |  |  |  | 1324 | 0.30 | 0.03 | νCN(P)+γCH2(M) |
| 1288 | s | 1288 | w | 1324 | 0.12 | 0.01 | νCC(Ph)+δ(i.p.)CH(Ph) |
|  |  |  |  | 1321 | 0.01 | 0.00 | νCC(A)+γCH2(A) |
| 1273 | m |  |  | 1319 | 0.07 | 0.00 | νCC(A) |
|  |  |  |  | 1316 | 0.00 | 0.00 | νCC(A) |
|  |  |  |  | 1305 | 0.06 | 0.01 | νCN(P)+νCC(P) |
| 1257 | m | 1255 | m | 1298 | 0.16 | 0.04 | νCN(T)+νCS+νNN |
|  |  |  |  | 1281 | 0.10 | 0.07 | γCH2(A) |
|  |  |  |  | 1278 | 0.05 | 0.06 | γCH2(A) |
| 1242 | m | 1244 | sh | 1261 | 0.29 | 0.02 | νCN(P)+νCC(P) |
|  |  |  |  | 1216 | 0.02 | 0.03 | ωCH2(P) |
| 1205 | sh |  |  | 1212 | 0.06 | 0.08 | νC(M)C(Ph)+δ(i.p.)CH(Ph) |
| 1196 | m |  |  | 1211 | 0.01 | 0.05 | γCH2(A) |
| 1184 | sh | 1184 | m | 1208 | 0.01 | 0.06 | γCH2(A) |
| 1174 | vs |  |  | 1202 | 0.13 | 0.02 | νCN(P)+νCC(P) |
|  |  |  |  | 1194 | 0.00 | 0.02 | δ(i.p.)CH(Ph) |
|  |  |  |  | 1185 | 0.02 | 0.02 | δ(i.p.)CH(Ph) |
|  |  | 1166 | m | 1181 | 0.83 | 0.02 | νC(M)N(P)+νC(P)C(Ph) |
|  |  |  |  | 1172 | 0.00 | 0.01 | δ(i.p.)CH(Ph) |
|  |  |  |  | 1169 | 0.00 | 0.01 | δ(i.p.)CH(Ph) |
| 1144 | m |  |  | 1164 | 0.35 | 0.01 | νCN(T)+νN(T)C(M)+νC(M)N(P) |
|  |  |  |  | 1156 | 0.07 | 0.05 | νCN(P)+νN(P)C(M) |
|  |  |  |  | 1153 | 0.18 | 0.03 | νCN(P)+νCC(P) |
| 1128 | s |  |  | 1144 | 0.00 | 0.00 | ρCH(A) |
|  |  |  |  | 1134 | 0.00 | 0.00 | γCH2(A) |
| 1113 | sh |  |  | 1127 | 0.01 | 0.02 | ρCH(A) |
|  |  |  |  | 1126 | 0.01 | 0.01 | ρCH(A) |
|  |  |  |  | 1123 | 0.01 | 0.01 | ρCH(A) |
| 1103 | m | 1100 | m | 1114 | 0.06 | 0.02 | νCN(T)+νN(T)C(Ph) |
| 1080 | w |  |  | 1104 | 0.08 | 0.03 | νN(T)C(Ph)+νC(T)C(Ph) |
|  |  |  |  | 1101 | 0.07 | 0.00 | ρCH2(P) |
|  |  |  |  | 1096 | 0.05 | 0.00 | ρCH2(P) |
| 1072 | s | 1076 | w | 1089 | 0.14 | 0.01 | νCN(T)+νNN |
|  |  |  |  | 1077 | 0.00 | 0.00 | ρCH2(P) |
| 1061 | m |  |  | 1063 | 0.00 | 0.00 | δCCC(A)+γCH2(A) |
|  |  |  |  | 1063 | 0.00 | 0.00 | δCCC(A)+γCH2(A) |
|  |  |  |  | 1059 | 0.00 | 0.00 | δCCC(A)+γCH2(A) |
| 1018 | sh | 1018 | w | 1051 | 0.02 | 0.04 | νCC(Ph)+δ(i.p.)CH(Ph)+δCCC(Ph) |
|  |  |  |  | 1049 | 0.02 | 0.03 | νCC(Ph)+δ(i.p.)CH(Ph)+δCCC(Ph) |
|  |  |  |  | 1028 | 0.03 | 0.01 | νCN(P)+νCC(P) |
| 1011 | s |  |  | 1024 | 0.37 | 0.01 | νCN(P)+νCC(P) |
|  |  |  |  | 1022 | 0.08 | 0.04 | νNN+νCC(P) |
|  |  | 1001 | vs | 1019 | 0.01 | 0.08 | δCCC(Ph) |
|  |  |  |  | 1014 | 0.03 | 0.02 | δ(o.o.p.)CH(Ph) |
|  |  |  |  | 1013 | 0.06 | 0.06 | δCCC(Ph) |
| 997 | m | 997 | sh | 1011 | 0.20 | 0.01 | δ(o.o.p.)CH(Ph)+δNCN(T) |
|  |  |  |  | 1008 | 0.01 | 0.00 | δ(o.o.p.)CH(Ph) |
| 984 | m |  |  | 994 | 0.02 | 0.02 | νCC(Ph) |
|  |  | 976 | sh | 990 | 0.00 | 0.00 | δ(o.o.p.)CH(Ph) |
|  |  |  |  | 988 | 0.00 | 0.02 | νCC(A) |
|  |  |  |  | 986 | 0.02 | 0.03 | δCCC(A) |
| 972 | w | 971 | m | 984 | 0.00 | 0.00 | δ(o.o.p.)CH(Ph) |
|  |  |  |  | 976 | 0.02 | 0.01 | ρCH2(M) |
|  |  |  |  | 955 | 0.00 | 0.01 | δCCC(A) |
|  |  | 936 | w | 955 | 0.00 | 0.00 | δCCC(A) |
| 924 | w |  |  | 942 | 0.00 | 0.01 | δ(o.o.p.)CH(Ph) |
|  |  |  |  | 937 | 0.02 | 0.00 | δ(o.o.p.)CH(Ph) |
| 916 | w |  |  | 919 | 0.06 | 0.00 | δCCN(P) |
|  |  |  |  | 902 | 0.00 | 0.00 | δCCC(A)+ρCH2(A) |
|  |  |  |  | 901 | 0.00 | 0.00 | δCCC(A)+ρCH2(A) |
|  |  |  |  | 895 | 0.00 | 0.00 | δCCC(A)+ρCH2(A) |
|  |  |  |  | 884 | 0.01 | 0.03 | δCCC(A) |
| 860 | w | 858 | w | 862 | 0.00 | 0.01 | δ(o.o.p.)CH(Ph) |
| 853 | sh | 853 | sh | 861 | 0.00 | 0.01 | ρCH2(P) |
|  |  |  |  | 857 | 0.00 | 0.01 | δCCC(A)+ρCH2(A) |
|  |  |  |  | 833 | 0.08 | 0.02 | δCCC(A)+ρCH2(A) |
|  |  |  |  | 831 | 0.00 | 0.00 | δCCC(A) |
| 820 | m |  |  | 826 | 0.01 | 0.00 | νCC(A) |
| 807 | sh | 805 | w | 824 | 0.12 | 0.01 | νCN(P) |
| 783 | m | 783 | sh | 808 | 0.19 | 0.00 | νCN(T)+νC(Ph)N(T)+νC(M)N(T) |
| 776 | sh | 774 | m | 793 | 0.05 | 0.03 | δCCN(P) |
| 769 | w | 768 | m | 779 | 0.03 | 0.01 | δ(o.o.p.)CH(Ph) |
| 756 | m | 756 | sh | 770 | 0.11 | 0.08 | νCC(A) |
| 741 | s |  |  | 756 | 0.09 | 0.07 | νCC(P)+νCN(P)+νCC(Ph) |
| 721 | w | 720 | vw | 725 | 0.01 | 0.00 | δ(o.o.p.)NCN(T) |
| 708 | m | 706 | m | 718 | 0.28 | 0.01 | δ(o.o.p.)CH(Ph) |
|  |  | 700 | sh | 714 | 0.27 | 0.01 | δ(o.o.p.)CH(Ph) |
| 696 | s |  |  | 707 | 0.04 | 0.02 | δCCC(Ph) |
| 685 | sh |  |  | 691 | 0.02 | 0.01 | δCCC(A) |
| 678 | sh |  |  | 674 | 0.04 | 0.01 | δ(o.o.p.)NCN(T)+δ(o.o.p.)CH(Ph) |
| 663 | m | 663 | vw | 665 | 0.06 | 0.01 | ρCS(o.o.p.)+δCNC(T) |
|  |  | 649 | m | 662 | 0.02 | 0.01 | δCCC(A) |
|  |  | 643 | sh | 659 | 0.00 | 0.00 | δCCC(A) |
|  |  | 623 | w | 639 | 0.22 | 0.01 | triazole ring librations |
|  |  | 615 | m | 632 | 0.00 | 0.01 | δCCC(Ph) |
|  |  | 609 | sh | 628 | 0.01 | 0.01 | δCCC(Ph) |
|  |  | 591 | vw | 593 | 0.00 | 0.01 | δCCC(Ph) |
|  |  | 554 | m | 564 | 0.03 | 0.02 | νCS+δ(i.p.)NNC(T) |
|  |  |  |  | 521 | 0.01 | 0.01 | δN(P)C(M)N(T) |
|  |  | 501 | vw | 505 | 0.00 | 0.01 | δCCN(P) |
|  |  |  |  | 493 | 0.01 | 0.01 | triazole ring librations |
|  |  | 485 | w | 486 | 0.02 | 0.00 | δ(o.o.p.)CCC(Ph) |
|  |  | 464 | w | 474 | 0.02 | 0.00 | δCCC(A) |
|  |  | 458 | sh | 462 | 0.02 | 0.00 | δCCC(A) |
|  |  |  |  | 447 | 0.01 | 0.00 | δCCC(A)+ρCH2(A) |
|  |  | 442 | sh | 445 | 0.01 | 0.00 | δCCC(A) |
|  |  | 436 | w | 435 | 0.01 | 0.00 | δCNC(P) |
|  |  |  |  | 425 | 0.00 | 0.00 | δ(o.o.p.)CCC(Ph) |
|  |  |  |  | 418 | 0.00 | 0.00 | δ(o.o.p.)CCC(Ph) |
|  |  |  |  | 417 | 0.00 | 0.00 | δCCC(A) |
|  |  | 410 | vw | 413 | 0.00 | 0.00 | δCCC(A) |
|  |  | 399 | vw | 400 | 0.00 | 0.00 | δCCN(P)+ρCH2(M) |
|  |  |  |  | 398 | 0.00 | 0.00 | δ(o.o.p.)NCN(T)+ρCH2(M) |
|  |  |  |  | 393 | 0.01 | 0.01 | δ(o.o.p.)NCN(T) |
|  |  | 359 | vw | 364 | 0.03 | 0.01 | ρCH2(M)+δCCC(A) |
|  |  | 340 | vw | 343 | 0.04 | 0.00 | δCNC(P) |
|  |  | 326 | vw | 331 | 0.00 | 0.00 | δCCC(A) |
|  |  | 315 | w | 327 | 0.00 | 0.00 | δCCC(A) |
|  |  | 302 | vw | 314 | 0.01 | 0.01 | δ(o.o.p.)NCN(T)+δCNC(P) |
|  |  | 281 | w | 280 | 0.01 | 0.01 | δCNC(P) |
|  |  | 270 | w | 274 | 0.01 | 0.01 | δ(o.o.p.)CNN(T) |
|  |  | 244 | sh | 264 | 0.00 | 0.00 | δCNC(P)+ρCH2(P) |
|  |  | 238 | w | 245 | 0.01 | 0.01 | δCCN(P)+ρ(i.p.)CS |
|  |  | 221 | w | 230 | 0.04 | 0.01 | “frame” deformations |
|  |  | 207 | vw | 212 | 0.00 | 0.01 | “frame” deformations |
|  |  | 198 | w | 204 | 0.01 | 0.00 | “frame” deformations |
|  |  | 175 | m | 186 | 0.01 | 0.02 | piperazine ring librations |
|  |  | 168 | sh | 176 | 0.01 | 0.00 | phenyl ring librations |
|  |  | 162 | sh | 160 | 0.01 | 0.00 | phenyl ring librations |
|  |  |  |  | 120 | 0.01 | 0.00 | “frame” deformations |
|  |  |  |  | 100 | 0.00 | 0.00 | “frame” deformations |
|  |  |  |  | 93 | 0.00 | 0.01 | “frame” deformations |
|  |  |  |  | 77 | 0.00 | 0.01 | “frame” deformations |
|  |  |  |  | 66 | 0.00 | 0.01 | “frame” deformations |
|  |  |  |  | 61 | 0.00 | 0.02 | “frame” deformations |
|  |  |  |  | 59 | 0.00 | 0.01 | “frame” deformations |
|  |  |  |  | 47 | 0.00 | 0.03 | “frame” deformations |
|  |  |  |  | 43 | 0.00 | 0.02 | “frame” deformations |
|  |  |  |  | 38 | 0.00 | 0.02 | “frame” deformations |
|  |  |  |  | 31 | 0.01 | 0.00 | “frame” deformations |
|  |  |  |  | 18 | 0.00 | 0.00 | “frame” deformations |
|  |  |  |  | 10 | 0.00 | 0.00 | “frame” deformations |

Notes: vs – very strong, s – strong, m – medium, w – weak, vw – very weak, sh – shoulder.

Table S6. Frequencies and intensities in experimental and calculated IR and Raman spectra of the compound **II**

| Observed | | | | Calculated | | | Assignment |
| --- | --- | --- | --- | --- | --- | --- | --- |
| IR | | Raman | | ν | IR | Raman |  |
| 3103 | w |  |  |  |  |  | 1602+1500 |
|  |  |  |  | 3211 | 0.03 | 0.44 | νCH(Ph) |
| 3085 | w | 3082 | vs | 3209 | 0.01 | 0.90 | νCH(Ph) |
|  |  |  |  | 3206 | 0.03 | 0.01 | νCH(Ph) |
| 3063 | m |  |  | 3198 | 0.08 | 0.98 | νCH(Ph) |
|  |  |  |  | 3196 | 0.13 | 0.36 | νCH(Ph) |
| 3035 | m | 3038 | wv | 3190 | 0.16 | 0.19 | νCH(Ph) |
|  |  |  |  | 3186 | 0.03 | 0.45 | νCH(Ph) |
|  |  |  |  | 3175 | 0.00 | 0.16 | νCH(Ph) |
| 3022 | m |  |  | 3172 | 0.06 | 0.49 | νCH(Ph) |
| 3005 | m | 3002 | m | 3165 | 0.04 | 0.17 | νCH(Ph) |
|  |  |  |  | 3123 | 0.09 | 0.26 | νCH(P) |
| 2981 | m |  |  |  |  |  | 2×1500 |
|  |  |  |  | 3096 | 0.10 | 0.18 | νCH2(M) |
|  |  | 2964 | vs | 3094 | 0.16 | 0.51 | νCH(A) |
|  |  |  |  | 3094 | 0.04 | 0.22 | νCH(A) |
|  |  |  |  | 3091 | 0.09 | 0.34 | νCH(P) |
|  |  |  |  | 3090 | 0.13 | 0.17 | νCH2(A) |
|  |  |  |  | 3084 | 0.08 | 0.18 | νCH2(A) |
|  |  | 2935 | vs | 3062 | 0.16 | 0.29 | νCH(P) |
|  |  |  |  | 3056 | 0.45 | 0.65 | νCH2(A) |
|  |  | 2922 | sh | 3053 | 0.29 | 0.95 | νCH2(A) |
|  |  |  |  | 3051 | 0.07 | 0.23 | νCH2(A) |
|  |  |  |  | 3050 | 0.08 | 0.18 | νCH2(A) |
|  |  |  |  | 3041 | 0.31 | 1.00 | νCH2(A) |
|  |  |  |  | 3036 | 0.62 | 0.15 | νCH2(A) |
|  |  |  |  | 3034 | 0.35 | 0.31 | νCH(A) |
|  |  |  |  | 3025 | 0.16 | 0.11 | νCH(A)+νCH2(A) |
|  |  | 2867 | m | 3023 | 0.00 | 0.24 | νCH2(A) |
|  |  |  |  | 3012 | 0.08 | 0.17 | νCH2(A) |
|  |  |  |  | 3011 | 0.07 | 0.17 | νCH(A)+νCH2(A) |
| 2853 | vs |  |  | 3011 | 0.07 | 0.28 | νCH2(A) |
|  |  | 2834 | m | 3008 | 0.13 | 0.30 | νCH2(M) |
|  |  |  |  | 2949 | 0.52 | 0.25 | νCH(P)+νCH2(P) |
|  |  |  |  | 2940 | 0.35 | 0.07 | νCH(P)+νCH2(P) |
|  |  |  |  | 2929 | 0.07 | 0.51 | νCH(P)+νCH2(P) |
| 2818 | vs |  |  | 2910 | 0.35 | 0.32 | νCH(P)+νCH2(P) |
| 2763 | m |  |  |  |  |  | 1473+1291 |
| 2734 | w |  |  |  |  |  | 2×1380 |
| 2711 | sh |  |  |  |  |  | 1380+1331 |
| 2701 | w |  |  |  |  |  | 1363+1338 |
| 2681 | w |  |  |  |  |  | 2×1352 |
| 2651 | w |  |  |  |  |  | 1338+1313 |
| 1602 | vs | 1602 | vs | 1655 | 0.59 | 0.33 | νCC(Ph)+δ(i.p.)CCC(Ph) |
| 1596 | sh |  |  | 1650 | 0.05 | 0.11 | νCC(Ph) |
|  |  |  |  | 1639 | 0.01 | 0.03 | νCC(Ph)+δ(i.p.)CCC(Ph) |
| 1577 | s |  |  | 1624 | 0.05 | 0.03 | νCC(Ph)+δ(i.p.)CCC(Ph) |
| 1541 | vs | 1542 | s | 1598 | 0.26 | 0.33 | νCN(T)+νCC(A) |
| 1500 | vs |  |  | 1529 | 0.54 | 0.01 | νCC(Ph) |
| 1495 | sh |  |  | 1527 | 0.36 | 0.01 | νCC(Ph)+δ(i.p.)CCC(Ph) |
|  |  |  |  | 1496 | 0.00 | 0.01 | σCH2(A) |
| 1473 | m |  |  | 1485 | 0.03 | 0.07 | σCH2(M) |
| 1454 | vs | 1452 | sh | 1483 | 0.00 | 0.01 | νCC(Ph)+δ(i.p.)CH(Ph) |
|  |  |  |  | 1478 | 0.02 | 0.00 | νCC(Ph)+δ(i.p.)CH(Ph) |
|  |  |  |  | 1477 | 0.04 | 0.01 | σCH2(A) |
|  |  | 1446 | s | 1472 | 0.19 | 0.04 | σCH2(P) |
|  |  |  |  | 1471 | 0.06 | 0.01 | σCH2(A) |
| 1434 | s |  |  | 1470 | 0.04 | 0.02 | σCH2(A) |
| 1413 | s | 1413 | w | 1461 | 0.30 | 0.05 | σCH2(P) |
|  |  |  |  | 1459 | 0.00 | 0.05 | σCH2(A) |
| 1395 | s |  |  | 1457 | 0.19 | 0.05 | ωCH2(P) |
|  |  |  |  | 1453 | 0.04 | 0.05 | σCH2(A)+σCH2(P) |
|  |  |  |  | 1452 | 0.22 | 0.04 | σCH2(A)+σCH2(P) |
|  |  |  |  | 1443 | 0.36 | 0.07 | σCH2(P)+γCH2(M) |
|  |  |  |  | 1425 | 0.07 | 0.02 | σCH2(P)+σCH2(M) |
| 1384 | vs | 1387 | m | 1413 | 0.13 | 0.04 | σCH2(P)+σCH2(M) |
| 1380 | vs |  |  | 1404 | 0.29 | 0.09 | νCN(T)+νC(T)C(A)+νN(T)C(Ph) |
|  |  |  |  | 1400 | 0.11 | 0.01 | ωCH2(P)+νCN(T) |
|  |  |  |  | 1399 | 0.33 | 0.05 | νCC(A) |
|  |  |  |  | 1394 | 0.01 | 0.00 | νCC(A) |
| 1363 | s |  |  | 1393 | 0.19 | 0.02 | ωCH(A) |
| 1352 | s | 1350 | w | 1390 | 0.07 | 0.03 | νCN(P)+ωCH2(P) |
|  |  |  |  | 1378 | 0.01 | 0.00 | νCC(A)+ωCH2(A) |
|  |  |  |  | 1377 | 0.06 | 0.06 | ωCH2(P) |
|  |  |  |  | 1374 | 0.00 | 0.00 | νCC(A)+ωCH2(A) |
| 1338 | sh |  |  | 1362 | 0.03 | 0.01 | νCC(Ph)+δ(i.p.)CH(Ph) |
| 1331 | vs | 1332 | s | 1356 | 0.46 | 0.05 | νCN(T)+νNN(T) |
|  |  |  |  | 1354 | 0.01 | 0.00 | νCC(Ph)+δ(i.p.)CH(Ph) |
|  |  |  |  | 1352 | 0.09 | 0.03 | ωCH2(P)+δ(i.p.)CH(Ph) |
|  |  | 1328 | sh | 1349 | 0.05 | 0.00 | ωCH(A)+ωCH2(A) |
| 1313 | s | 1312 | sh | 1345 | 0.27 | 0.01 | ωCH(A)+νCN(T) |
|  |  |  |  | 1344 | 0.01 | 0.00 | ωCH(A) |
|  |  |  |  | 1340 | 0.23 | 0.01 | νCC(A)+νC(M)N(T) |
|  |  |  |  | 1338 | 0.03 | 0.01 | ωCH2(P)+δ(i.p.)CH(Ph) |
| 1291 | s |  |  | 1333 | 1.00 | 0.02 | νCN(P)+γCH2(P) |
|  |  |  |  | 1328 | 0.10 | 0.05 | νCN(P)+γCH2(M) |
|  |  |  |  | 1323 | 0.05 | 0.00 | νCC(Ph)+δ(i.p.)CH(Ph) |
|  |  |  |  | 1323 | 0.00 | 0.01 | νCC(A)+γCH2(A) |
| 1275 | s |  |  | 1319 | 0.01 | 0.00 | νCC(A) |
|  |  |  |  | 1314 | 0.01 | 0.00 | νCC(A) |
| 1254 | s | 1257 | m | 1300 | 0.13 | 0.06 | νCN(T)+νCS+νNN |
|  |  |  |  | 1285 | 0.08 | 0.06 | γCH2(A)+γCH2(P) |
|  |  |  |  | 1282 | 0.05 | 0.07 | γCH2(A) |
|  |  |  |  | 1278 | 0.11 | 0.06 | γCH2(A) |
| 1238 | vs | 1240 | sh | 1256 | 0.91 | 0.04 | νCN(P)+νCC(P) |
| 1229 | sh | 1230 | w | 1236 | 0.14 | 0.02 | νCN(P)+νCC(P) |
| 1211 | s | 1207 | wv | 1223 | 0.07 | 0.04 | ωCH2(P) |
| 1200 | s | 1196 | sh | 1211 | 0.01 | 0.06 | γCH2(A) |
| 1185 | m | 1184 | w | 1205 | 0.00 | 0.05 | γCH2(A) |
|  |  |  |  | 1199 | 0.03 | 0.02 | δ(i.p.)CH(Ph) |
|  |  |  |  | 1185 | 0.10 | 0.01 | νCN(P)+νCC(P) |
|  |  |  |  | 1183 | 0.05 | 0.02 | νCN(P)+νCC(P) |
| 1160 | vs | 1162 | w | 1176 | 0.59 | 0.06 | νC(M)N(P)+νC(P)C(Ph) |
|  |  |  |  | 1171 | 0.00 | 0.01 | δ(i.p.)CH(Ph) |
|  |  |  |  | 1169 | 0.01 | 0.02 | δ(i.p.)CH(Ph) |
| 1155 | s |  |  | 1160 | 0.18 | 0.04 | νCN(T)+νN(T)C(M)+νC(M)N(P) |
| 1128 | s |  |  | 1144 | 0.00 | 0.00 | ρCH(A) |
|  |  |  |  | 1137 | 0.00 | 0.00 | γCH2(A) |
|  |  |  |  | 1128 | 0.00 | 0.02 | ρCH(A) |
|  |  |  |  | 1125 | 0.00 | 0.01 | ρCH(A) |
| 1109 | m | 1109 | w | 1124 | 0.01 | 0.01 | ρCH(A) |
| 1103 | m |  |  | 1114 | 0.04 | 0.01 | νCN(T)+νN(T)C(Ph) |
|  |  |  |  | 1105 | 0.02 | 0.00 | δ(i.p.)CH(Ph) |
| 1081 | s |  |  | 1104 | 0.05 | 0.01 | νN(T)C(Ph)+νC(T)C(Ph) |
|  |  |  |  | 1095 | 0.04 | 0.00 | δ(i.p.)CH(Ph) |
| 1071 | s |  |  | 1090 | 0.08 | 0.01 | νCN(T)+νNN |
|  |  |  |  | 1076 | 0.00 | 0.01 | ρCH2(P) |
|  |  |  |  | 1069 | 0.02 | 0.05 | ρCH2(P) |
| 1054 | m |  |  | 1064 | 0.00 | 0.00 | δCCC(A)+ρCH2(A) |
| 1030 | m | 1032 | w | 1060 | 0.00 | 0.00 | δCCC(A)+ρCH2(A) |
|  |  |  |  | 1055 | 0.04 | 0.10 | νCC(Ph)+δ(i.p.)CH(Ph)+δCCC(Ph) |
|  |  |  |  | 1053 | 0.00 | 0.00 | δCCC(A)+ρCH2(A) |
|  |  |  |  | 1048 | 0.02 | 0.03 | νCC(Ph)+δ(i.p.)CH(Ph)+δCCC(Ph) |
| 1012 | vs |  |  | 1022 | 0.19 | 0.07 | νCN(P)+νCC(P) |
| 1008 | sh |  |  | 1019 | 0.14 | 0.01 | νCN(P)+νCC(P) |
|  |  | 1000 | vs | 1018 | 0.02 | 0.06 | δCCC(Ph) |
|  |  |  |  | 1013 | 0.08 | 0.00 | δ(o.o.p.)CH(Ph) |
| 996 | s |  |  | 1011 | 0.16 | 0.00 | δ(o.o.p.)CH(Ph)+δNCN(T) |
|  |  |  |  | 1004 | 0.01 | 0.14 | νCC(Ph)+δ(i.p.)CH(Ph)+δCCC(Ph) |
|  |  |  |  | 994 | 0.00 | 0.01 | δ(o.o.p.)CH(Ph) |
| 976 | m |  |  | 994 | 0.01 | 0.02 | δ(o.o.p.)CH(Ph) |
|  |  |  |  | 988 | 0.03 | 0.03 | νCC(A) |
|  |  | 972 | sh | 987 | 0.00 | 0.00 | δ(o.o.p.)CH(Ph) |
|  |  |  |  | 986 | 0.00 | 0.03 | δCCC(A) |
|  |  |  |  | 973 | 0.00 | 0.00 | δ(o.o.p.)CH(Ph) |
| 953 | w |  |  | 959 | 0.07 | 0.01 | δCCC(A) |
|  |  |  |  | 955 | 0.02 | 0.01 | δCCC(A) |
| 939 | sh | 936 | w | 951 | 0.00 | 0.00 | δCCC(A) |
| 926 | s |  |  | 942 | 0.09 | 0.01 | δ(o.o.p.)CH(Ph)+νCN(P)+νCC(P) |
| 921 | vs | 921 | w | 939 | 0.02 | 0.02 | δ(o.o.p.)CH(Ph) |
| 889 | w |  |  | 901 | 0.00 | 0.00 | δCCC(A)+ρCH2(A) |
| 884 | sh |  |  | 900 | 0.00 | 0.00 | δCCC(A)+ρCH2(A) |
|  |  |  |  | 898 | 0.02 | 0.01 | δ(o.o.p.)CH(Ph) |
|  |  |  |  | 897 | 0.00 | 0.00 | δCCC(A)+ρCH2(A) |
|  |  |  |  | 882 | 0.02 | 0.03 | δCCC(A) |
| 862 | m | 863 | w | 861 | 0.01 | 0.00 | δ(o.o.p.)CH(Ph) |
|  |  |  |  | 854 | 0.00 | 0.01 | ρCH2(P) |
|  |  |  |  | 836 | 0.01 | 0.01 | δ(o.o.p.)CH(Ph) |
|  |  |  |  | 832 | 0.00 | 0.00 | δCCC(A) |
| 824 | m |  |  | 827 | 0.00 | 0.00 | νCC(A) |
| 815 | m |  |  | 820 | 0.05 | 0.05 | νCN(P) |
| 787 | vs | 788 | w | 805 | 0.15 | 0.01 | νCN(T)+νC(Ph)N(T)+νC(M)N(T) |
|  |  |  |  | 779 | 0.01 | 0.01 | δ(o.o.p.)CH(Ph) |
| 767 | vs | 767 | m | 775 | 0.16 | 0.01 | δ(o.o.p.)CH(Ph) |
| 756 | sh | 761 | sh | 769 | 0.10 | 0.08 | νCC(A) |
| 739 | m | 741 | w | 748 | 0.02 | 0.03 | νCC(P)+νCN(P)+νCC(Ph) |
| 721 | m |  |  | 726 | 0.01 | 0.00 | δ(o.o.p.)NCN(T) |
| 705 | sh | 707 | w | 712 | 0.16 | 0.01 | δ(o.o.p.)CH(Ph) |
| 700 | vs |  |  | 709 | 0.12 | 0.00 | δ(o.o.p.)CH(Ph) |
| 695 | sh |  |  | 705 | 0.04 | 0.01 | δCCC(Ph) |
|  |  |  |  | 691 | 0.01 | 0.01 | δCCC(A) |
| 664 | m |  |  | 672 | 0.01 | 0.01 | δ(o.o.p.)NCN(T)+δ(o.o.p.)CH(Ph) |
| 654 | s | 653 | m | 661 | 0.00 | 0.01 | δCCC(A) |
|  |  |  |  | 658 | 0.00 | 0.01 | δCCC(A) |
|  |  |  |  | 645 | 0.01 | 0.01 | ρCS(o.o.p.)+δCNC(T) |
|  |  | 620 | w | 637 | 0.13 | 0.01 | triazole ring librations |
|  |  |  |  | 629 | 0.00 | 0.02 | δCCC(Ph) |
|  |  | 588 | vw | 626 | 0.00 | 0.01 | δCCC(Ph) |
|  |  | 555 | w | 570 | 0.03 | 0.02 | νCS+δ(i.p.)NNC(T) |
|  |  | 545 | sh | 552 | 0.01 | 0.01 | δN(P)C(M)N(T) |
|  |  | 505 | vw | 537 | 0.04 | 0.00 | δ(o.o.p.)CCC(Ph) |
|  |  |  |  | 497 | 0.00 | 0.00 | triazole ring librations |
|  |  |  |  | 492 | 0.00 | 0.01 | δCCN(P) |
|  |  | 481 | vw | 483 | 0.02 | 0.00 | δ(o.o.p.)CCC(Ph) |
|  |  |  |  | 473 | 0.01 | 0.00 | δCCC(A) |
|  |  |  |  | 457 | 0.01 | 0.00 | δCCC(A) |
|  |  |  |  | 448 | 0.00 | 0.00 | δCCC(A)+ρCH2(A) |
|  |  | 443 | w | 446 | 0.01 | 0.01 | δCCC(A) |
|  |  |  |  | 435 | 0.01 | 0.01 | δCNC(P) |
|  |  |  |  | 423 | 0.01 | 0.00 | δ(o.o.p.)CCC(Ph) |
|  |  |  |  | 423 | 0.00 | 0.00 | δ(o.o.p.)CCC(Ph) |
|  |  |  |  | 415 | 0.00 | 0.00 | δCCC(A) |
|  |  | 409 | w | 412 | 0.00 | 0.01 | δCCC(A) |
|  |  |  |  | 408 | 0.00 | 0.00 | δCCN(P)+ρCH2(M) |
|  |  |  |  | 393 | 0.00 | 0.00 | δ(o.o.p.)NCN(T)+ρCH2(M) |
|  |  | 365 | vw | 363 | 0.01 | 0.01 | ρCH2(M)+δCCC(A) |
|  |  |  |  | 338 | 0.01 | 0.01 | δCNC(P) |
|  |  | 323 | w | 331 | 0.01 | 0.00 | δCCC(A) |
|  |  | 311 | sh | 323 | 0.00 | 0.00 | δCCC(A) |
|  |  |  |  | 317 | 0.02 | 0.01 | δ(o.o.p.)NCN(T)+δCNC(P) |
|  |  | 280 | w | 307 | 0.01 | 0.00 | δCNC(P) |
|  |  |  |  | 275 | 0.00 | 0.01 | δ(o.o.p.)CNN(T) |
|  |  |  |  | 263 | 0.01 | 0.00 | δCNC(P)+ρCH2(P) |
|  |  |  |  | 242 | 0.01 | 0.01 | δCCN(P)+ρ(i.p.)CS |
|  |  |  |  | 229 | 0.02 | 0.01 | “frame” deformations |
|  |  |  |  | 216 | 0.00 | 0.02 | “frame” deformations |
|  |  |  |  | 204 | 0.01 | 0.01 | “frame” deformations |
|  |  |  |  | 197 | 0.00 | 0.00 | piperazine ring librations |
|  |  |  |  | 157 | 0.00 | 0.01 | phenyl ring librations |
|  |  |  |  | 148 | 0.03 | 0.02 | phenyl ring librations |
|  |  |  |  | 114 | 0.00 | 0.01 | “frame” deformations |
|  |  |  |  | 108 | 0.00 | 0.00 | “frame” deformations |
|  |  |  |  | 86 | 0.00 | 0.01 | “frame” deformations |
|  |  |  |  | 72 | 0.01 | 0.01 | “frame” deformations |
|  |  |  |  | 64 | 0.00 | 0.00 | “frame” deformations |
|  |  |  |  | 59 | 0.00 | 0.02 | “frame” deformations |
|  |  |  |  | 51 | 0.00 | 0.01 | “frame” deformations |
|  |  |  |  | 47 | 0.01 | 0.00 | “frame” deformations |
|  |  |  |  | 43 | 0.00 | 0.04 | “frame” deformations |
|  |  |  |  | 34 | 0.00 | 0.02 | “frame” deformations |
|  |  |  |  | 19 | 0.00 | 0.01 | “frame” deformations |
|  |  |  |  | 14 | 0.00 | 0.01 | “frame” deformations |

Notes: vs – very strong, s – strong, m – medium, w – weak, vw – very weak, sh – shoulder.
